# Supplementary material for: The role of the metal-bound N–H functionality in Noyori-type molecular catalysts
Source: Springer Nature journal article supplement (doi:10.1038/s41570-018-0049-z), 2018-11-15
Supplement: 41570_2018_49_MOESM1_ESM.pdf [file 41570_2018_49_MOESM1_ESM.pdf]

# The role of the metal-bound N–H functionality in Noyori-type molecular catalysts

---

*Pavel A. Dub and John C. Gordon*

<https://doi.org/10.1038/s41570-018-0049-z>

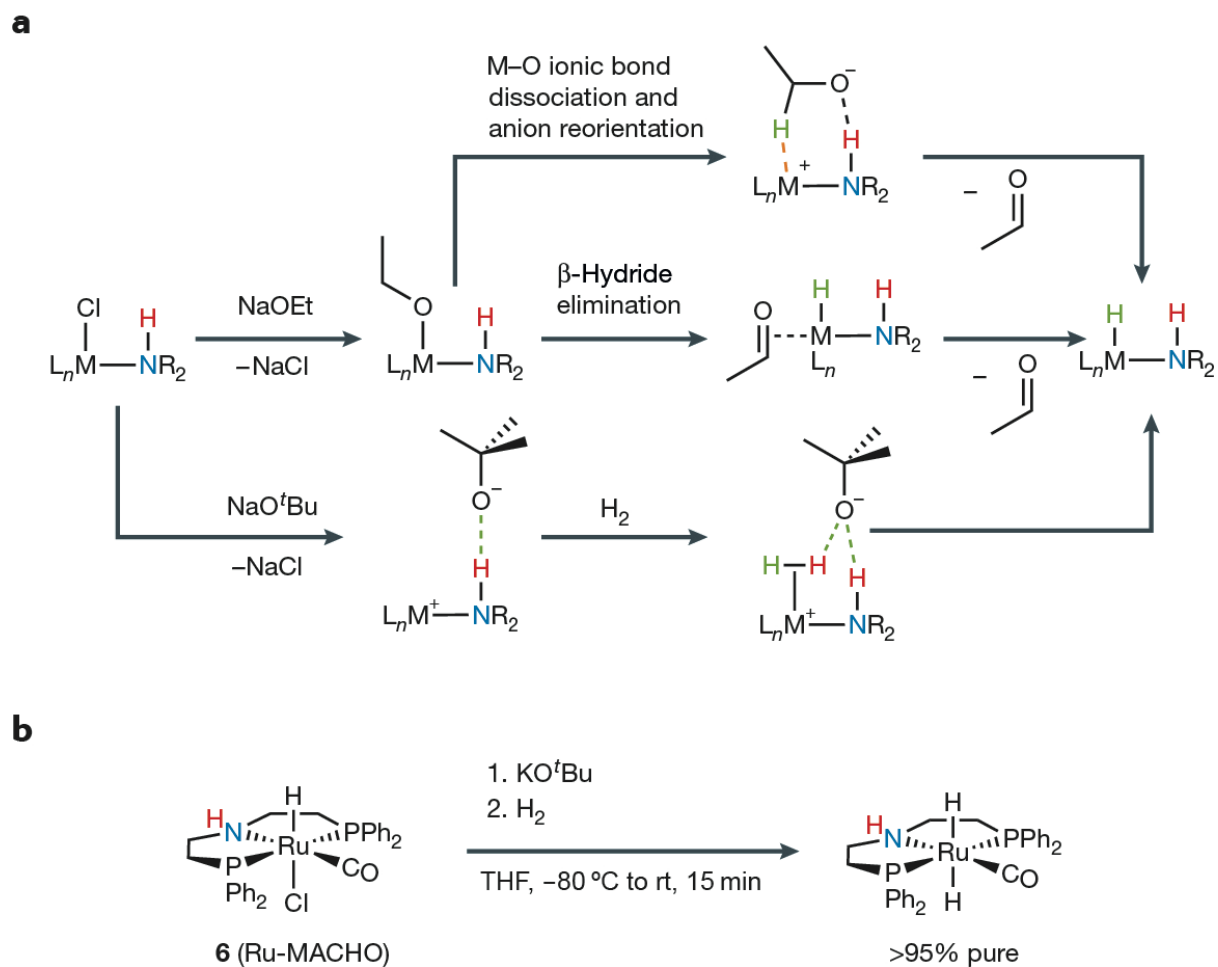

Figure S1 | **Reversible hydrogenation of esters mediated by M/N–H catalysts.** **a** | A prototypical chlorido precatalyst can be converted to a catalytically active hydrido complexes through one of three main mechanisms involving a stoichiometric amount of inorganic base (NaOEt or KO<sup>t</sup>Bu). In principle **b** | The chlorohydrido Ru-MACHO precatalyst **6** can be converted to a dihydrido derivative that is active for ester hydrogenation<sup>1</sup>.

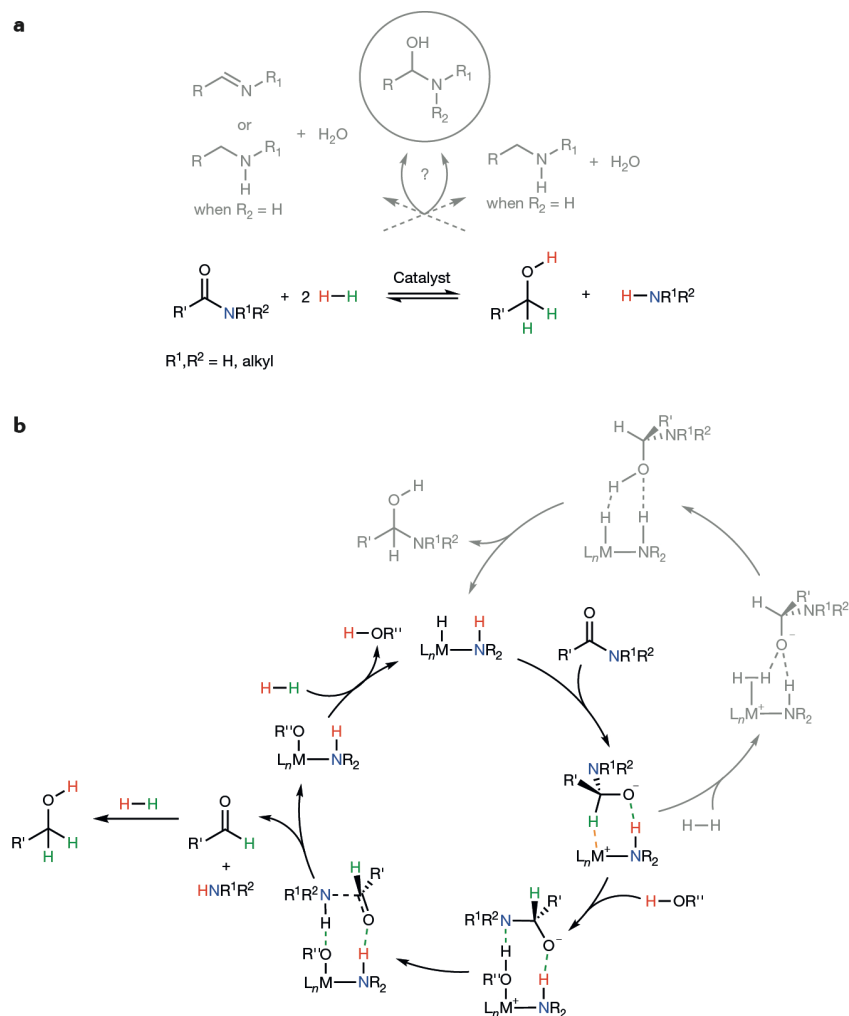

Figure S2 | **Reversible hydrogenation of carboxamides mediated by Noyori- type M/N-H catalysts.** **a** | Carboxamides typically undergo deaminative hydrogenation to afford primary alcohols and amines but can also undergo deoxygenative hydrogenation to afford an amine and water in some cases. Speculatively, hemiaminals can also be formed under kinetic control (cf. fluoroester hydrogenation)<sup>1,2</sup>, providing that they are relatively stable and isolable<sup>3-6</sup>. The reverse reaction, catalytic dehydrogenative coupling of primary alcohols with amines, can in addition and/or preferentially afford imines, or even amines. **b** | A simplified catalytic cycle for carboxamide ( $\text{R}'\text{C}(\text{O})\text{NR}'\text{R}''$ ) hydrogenation into hemiaminals is postulated in this Perspective. Alternative products include primary alcohols ( $\text{R}'\text{CH}_2\text{OH}$ ) and amines  $\text{HNR}'\text{R}''$ , as seen in recent studies<sup>7</sup>.

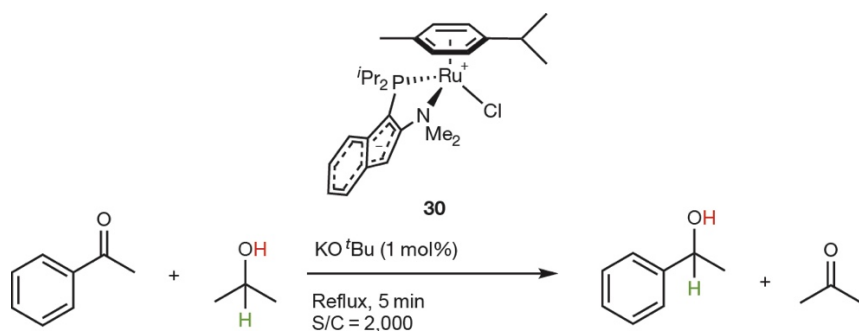

Figure S3 | **Transfer hydrogenation of acetophenone with a complex lacking an NH functionality.** The TOF reaches  $50 \text{ s}^{-1}$  after 20 s (Refs<sup>8,9</sup>).

## References

- Otsuka, T., Ishii, A., Dub, P. A. & Ikariya, T. Practical selective hydrogenation of  $\alpha$ -fluorinated esters with bifunctional pincer-type ruthenium(II) catalysts leading to fluorinated alcohols or fluoral hemiacetals. *J. Am. Chem. Soc.* **135**, 9600–9603 (2013).
- Ojeda-Porras, A. & Gamba-Sánchez, D. Recent developments in amide synthesis using nonactivated starting materials. *J. Org. Chem.* **81**, 11548–11555 (2016).
- Landge, S. M., Borkin, D. A. & Török, B. Microwave-assisted preparation of trifluoroacetaldehyde (fluoral): isolation and applications. *Tetrahedron Lett.* **48**, 6372–6376 (2007).
- Kwiecień, A. & Ciunik, Z. Stable hemiaminals: 2-aminopyrimidine derivatives. *Molecules* **20**, 14365–14376 (2015).
- Mispelaere, C. & Roques, N. Hemiaminals of trifluoroacetaldehyde, as trifluoromethylating agents. *Tetrahedron Lett.* **40**, 6411–6414 (1999).
- Folléas, B., Marek, I., Normant, J.-F. & Saint-Jalmes, L. Fluoroform: an efficient precursor for the trifluoromethylation of aldehydes *Tetrahedron* **56**, 275–283 (2000).
- Gusev, D. G. Rethinking the dehydrogenative amide synthesis. *ACS Catal.* **7**, 6656–6662 (2017).
- Lundgren, R. J. & Stradiotto, M. Rapid ketone transfer hydrogenation by employing simple, in situ prepared iridium(I) precatalysts supported by “non-N–H” P,N ligands. *Chem. Eur. J.* **14**, 10388–10395 (2008).
- Lundgren, R. J., Rankin, M. A., McDonald, R., Schatte, G. & Stradiotto, M. A formally zwitterionic ruthenium catalyst precursor for the transfer hydrogenation of ketones that does not feature an ancillary ligand N–H functionality. *Angew. Chem.* **119**, 4816–4819 (2007).
